# Supplementary material
Source: publisher site journal article supplement (https://www.spandidos-publications.com/3377/downloadSupplementary)

Figure S1. Representative flow cytometry plots for the uptake of CFPE-labeled liposomes by BCECs and U87 cells. BCECs, brain capillary endothelial cells; CFPE-Lip, conventional CFPE-carrying liposome; CFPE-FA-Lip, FA-modified CFPE-carrying liposome; CFPE, 1,2-dioleoyl-sn-glycero-3-phosphoethanolamine-N-carboxyfluorescein; FA, folic acid.

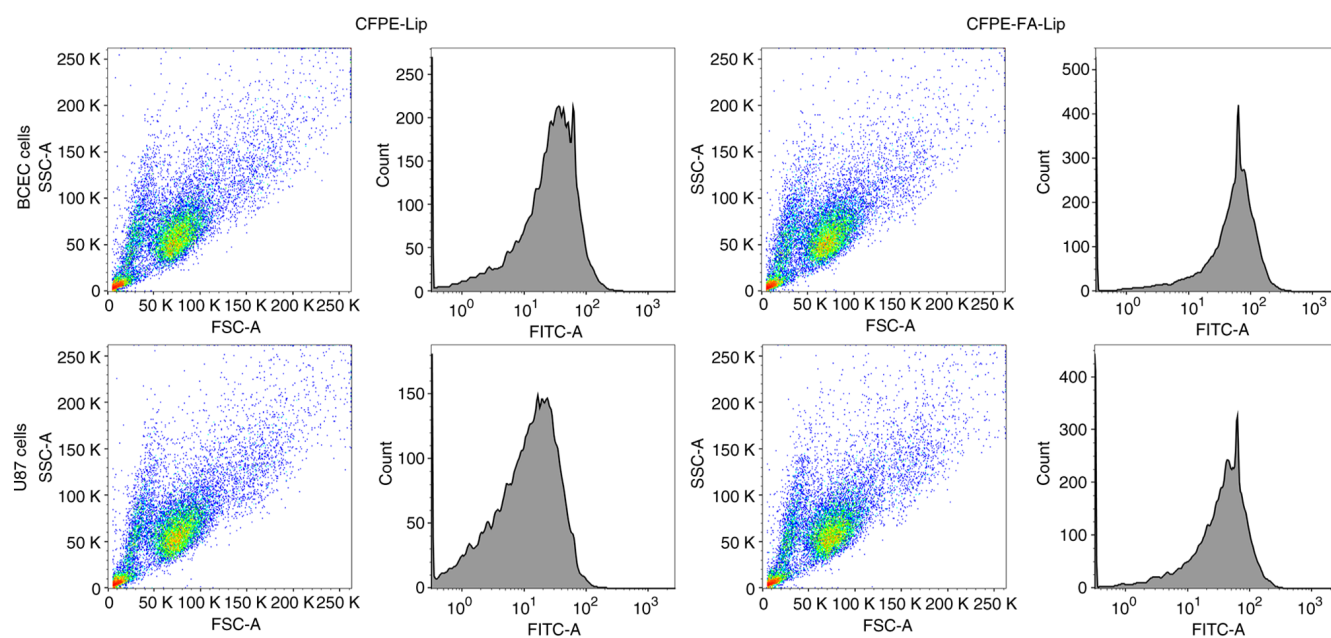

Figure S2. Representative flow cytometry plots for the stimulation of the apoptosis of U87 cells by Lid-Lip and Lid-FA-Lip at a range of lidocaine concentrations. Lid-Lip, conventional lidocaine-carrying liposome; Lid-FA-Lip, FA-modified lidocaine-carrying liposome; FA, folic acid.

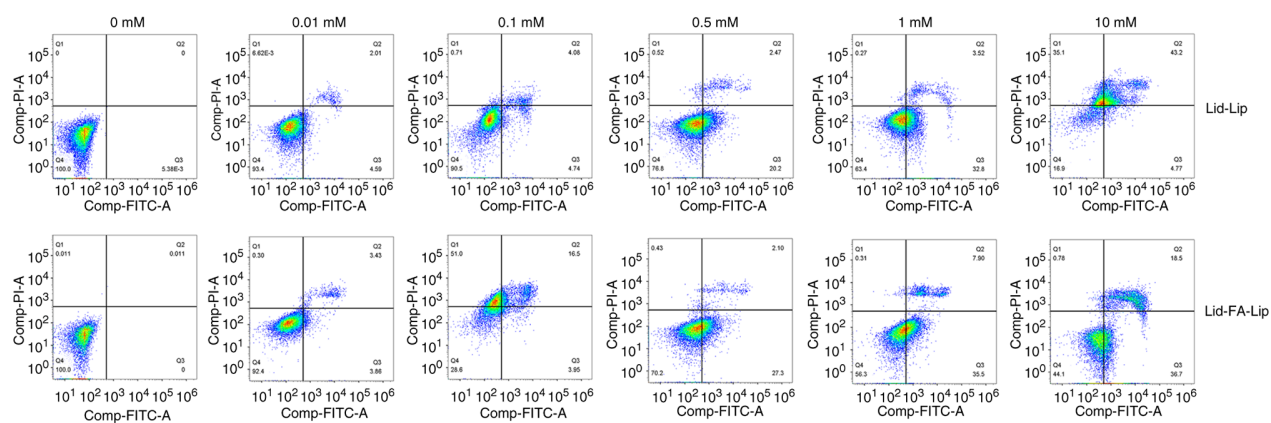

Supplement: Supplementary file 1 [file downloadSupplementary]
